# Supplementary material for: Exploring the phase for highest impact on radicality: a cross-sectional study of patient involvement in quality improvement in Swedish healthcare
Source: PubMed Central journal article supplement — BMJ Open. 2018 Nov 8;8(11):e021958. doi: 10.1136/bmjopen-2018-021958 (PMC6231560; doi:10.1136/bmjopen-2018-021958), 2018-11-08
Supplement: bmjopen-2018-021958.draft_revisions.pdf [file bmjopen-2018-021958.draft_revisions.pdf]

# BMJ Open

BMJ Open is committed to open peer review. As part of this commitment we make the peer review history of every article we publish publicly available.

When an article is published we post the peer reviewers' comments and the authors' responses online. We also post the versions of the paper that were used during peer review. These are the versions that the peer review comments apply to.

The versions of the paper that follow are the versions that were submitted during the peer review process. They are not the versions of record or the final published versions. They should not be cited or distributed as the published version of this manuscript.

BMJ Open is an open access journal and the full, final, typeset and author-corrected version of record of the manuscript is available on our site with no access controls, subscription charges or pay-per-view fees (<http://bmjopen.bmj.com>).

If you have any questions on BMJ Open's open peer review process please email [info.bmjopen@bmj.com](mailto:info.bmjopen@bmj.com)

# BMJ Open

## Identifying the right phase—increasing the impact of patient involvement in quality improvement

|                               |                                                                                                                                                                                                                                                                                                                                                    |
|-------------------------------|----------------------------------------------------------------------------------------------------------------------------------------------------------------------------------------------------------------------------------------------------------------------------------------------------------------------------------------------------|
| Journal:                      | <i>BMJ Open</i>                                                                                                                                                                                                                                                                                                                                    |
| Manuscript ID                 | bmjopen-2018-021958                                                                                                                                                                                                                                                                                                                                |
| Article Type:                 | Research                                                                                                                                                                                                                                                                                                                                           |
| Date Submitted by the Author: | 02-Feb-2018                                                                                                                                                                                                                                                                                                                                        |
| Complete List of Authors:     | Gremyr, I; Chalmers University of Technology, Technology Management and Economics<br>Elg, Mattias ; Linköping University, Department of Management and Engineering<br>Smith, Frida; Chalmers University of Technology, Department of Technology Management and Economics; Regional Cancer Centre West<br>Gustavsson, Susanne; Skaraborg's hospital |
| Keywords:                     | Quality in health care < HEALTH SERVICES ADMINISTRATION & MANAGEMENT, Organisational development < HEALTH SERVICES ADMINISTRATION & MANAGEMENT, Change management < HEALTH SERVICES ADMINISTRATION & MANAGEMENT                                                                                                                                    |
|                               |                                                                                                                                                                                                                                                                                                                                                    |

SCHOLARONE™  
Manuscripts

# Identifying the right phase—increasing the impact of patient involvement in quality improvement

## Authors:

Ida Gremyr, Professor<sup>1</sup>, Mattias Elg, Professor<sup>2</sup>, Frida Smith, PhD, Quality manager<sup>1,3</sup>,  
Susanne Gustafsson, PhD, Nursing director<sup>4</sup>

<sup>1</sup> Department of Technology Management and Economics, Chalmers University of Technology, Gothenburg, Sweden

<sup>2</sup> Department of Management and Engineering, Linköping University, Linköping, Sweden

<sup>3</sup> Regional Cancer Centre West, Gothenburg, Sweden

<sup>4</sup> Skaraborg's Hospital, Skövde, Sweden

## Corresponding author:

Ida Gremyr  
Department of Technology Management and Economics  
Chalmers University of Technology  
SE-412 96 Gothenburg  
Sweden

e-mail: [ida.gremyr@chalmers.se](mailto:ida.gremyr@chalmers.se)

Phone: +46 31 772 8182

Fax: +46 31 772 5944

**Keywords:** Quality in health care, Organisational development, Change management

**Word count of manuscript** (excl. title page, abstract, references, and tables/figures): 3075

# Identifying the right phase—increasing the impact of patient involvement in quality improvement

## ABSTRACT

**Objectives:** Involving patients in quality improvement is often suggested as a critical step for improving healthcare processes. However, this comes with challenges related to resources, tokenism, validity, and competence. Therefore, to optimise the use of available resources, there is a need to understand at what stage in the improvement cycle patient involvement is most beneficial. Thus, the purpose of this study was to identify the phase of an improvement cycle in which patient involvement had the highest impact on radicality of improvement.

**Design:** An exploratory design was used.

**Setting and methods:** A questionnaire was completed by 155 Swedish healthcare professionals who had trained and had experience in patient involvement in quality improvement. Based on their replies, the impact of patient involvement on radicality in various phases of the improvement cycle was modelled using the partial least squares method.

**Results:** Patient involvement in quality improvement might help to identify and realise innovative solutions; however, there is variation in the impact of patient involvement on improvement radicality depending on the phase in which patients become involved. The highest impact on radicality was observed in the phases of *capture experiences* and *taking action*, while a moderate impact was observed in the *evaluate* phase. The lowest impact was observed in the *identify and prioritise* phase.

**Conclusions:** Involving patients in improvement projects can enhance the quality of care and help to identify radically new ways of delivering care. This study shows that it is possible to clearly define at what point in an improvement cycle patient involvement has the highest impact, which will enable more efficient use of the resources available for patient involvement.

**Keywords:** patient involvement, improvement project, quality management, radicality

## Strengths and limitations of the study:

- The research team has practical and academic experience from both health care and quality improvement
- Radicality has been sparsely used as a measure for patient involvement in quality improvement
- The model allows for a prioritizing of when to involve patients in improvement projects
- Patients were not asked the same questions as health care professionals to validate results
- How the impact of patient involvement on radicality might be affected by the type of healthcare setting was not examined

## BACKGROUND

Healthcare today faces an imminent challenge originating from the paradox of survival—namely, a higher demand for care without additional budget [1]. Stretching available resources to cover more individuals while simultaneously pursuing new possibilities for treatment often using expensive methods has demanded radical changes in the organisation and improvement of existing healthcare systems. As a response to this challenge, patient involvement in quality improvement (QI) has increasingly been viewed as a means to generate more radical ideas for new healthcare services [2-5]. Radicality can be defined as the potential or novelty of a QI idea for meeting new needs of patients, thus generating solutions or innovations that range from incremental ('the same but better') to radical ('really different') [6,7]. Note that radicality does not necessarily refer to solutions that are new to the world, but solutions that allow for addressing previously unmet patient needs.

It is believed that patient involvement can lead to radically new and more resource-efficient ways of delivering healthcare [1]. These changes do not necessarily need to be on a large scale, it is often small things that can be questioned and pointed out by patients that can lead to effective new ways of working. To generate radical as opposed to incremental innovation, there needs to be a sense of urgency and a tension for change [8]. The fundament for the creation of a sense of urgency is a disconfirmation of taken-for-granted implicit assumptions. Potentially, this leads to organisational members experiencing the current conditions as inadequate and developing motivation for change. Utilising patients' experiences wisely (i.e. for the right purpose at the right time) can contribute to such a tension for change. For example, methods that involve customers in design activity [9] emphasise the need for coping with conflicting interests; thus, when staff is exposed to patients' first-hand experiences, this provides an insight into the need for change, i.e. it explicates the tension for change.

1  
2  
3 However, the impact of patient involvement on radicality per se has been questioned, and  
4 arguments have been put forth that patient involvement lends itself to more incremental rather  
5 than radical change [9].  
6

7 Patient involvement has been criticised for being exclusive and cosmetic, and for tokenism  
8 [2,10,11]. Furthermore, efforts to achieve greater involvement have been patchy and slow.  
9 Thus, it cannot be neglected that patient involvement imposes challenges in terms of  
10 resources [12], tokenism [13,14], validity [15], and competence [16]. Firstly, involving  
11 patients is time- and resource-consuming [15], and requires careful management to reach its  
12 full potential [10]. Secondly, if patients are asked but not listened to, tokenism might ensue in  
13 order to simply ‘tick the boxes’ [14], with hierarchical structures and asymmetrical patterns of  
14 power remaining unchallenged [13,17]. Thirdly, there may be validity issues with patient  
15 involvement studies where academic dissemination is preceded and therefore more rigorous  
16 evidence are desirable (15), or the validity of such studies needs to be confirmed to be  
17 accepted as high-quality research. Finally, in terms of competence, Batalden et al. [12]  
18 stressed that each level of shared work in co-creation between staff and patients requires  
19 specific knowledge of the subject matter, know-how, dispositions, and behaviours, thus  
20 pointing to a need for healthcare competence in QI work.  
21

22 Despite these challenges, there are promising examples of patient involvement in QI, for  
23 example in acute care [18], development of patient education materials [17], and neonatal care  
24 [19]. The positive effects of patient involvement include enabling patients to act as  
25 intermediaries between other patients and clinicians, which may help to convince healthcare  
26 professionals of a need for change [10]. Additionally, patient involvement may improve care  
27 efficiency and decrease costs, among other aspects [20]. However, overall, there is rather  
28 poor-quality evidence and few measurements to evaluate the impact of patient involvement  
29 [10,21,22].  
30

31 Thus, there are contradictory views on the potential of patient involvement to contribute to  
32 radical improvements in healthcare. A reason for this controversy lies in the uncertainty  
33 regarding how to work with patient involvement [2], in particular in terms of the most  
34 beneficial stage to involve patients in QI. Accordingly, the purpose of this study was to  
35 identify the phase of an improvement cycle in which patient involvement had the highest  
36 impact on the radicality of the improvement. This will aid in the optimisation of resource  
37 allocation to best support the contributions of patient involvement to radically new and  
38 improved ways of organising and delivering healthcare. For this purpose, we evaluated *when*  
39 patient involvement is most beneficial in an improvement cycle, which we divided into four  
40  
41  
42  
43  
44  
45  
46  
47  
48  
49  
50  
51  
52  
53  
54  
55  
56  
57  
58  
59  
60

1  
2  
3 phases according to the work of Bate and Robert [23]: *capture experiences, identify and*  
4 *prioritise, taking action, and evaluate*. The first phase involves capturing patient experiences,  
5 e.g. through interviews, films, diaries, etc. The second phase involves identifying and  
6 prioritising areas for improvement in the care process. Active involvement in QI is considered  
7 to comprise the third phase, *taking action*, while in the fourth phase, *evaluate*, patients can be  
8 involved in the follow-up and evaluation of improvements [23,24].  
9  
10  
11

## 12 13 **METHODS**

### 14 15 **Sample**

16 Data were collected through an online survey using a web-based survey tool provided by  
17 fluidsurveys.com. The original sample consisted of 472 participants who had training and  
18 practical experience in patient involvement in QI. The participants came from 3 (out of 20)  
19 Swedish healthcare regions, responsible for the provision of primary care, healthcare, dental  
20 care, etc. in a specific geographical area. Nineteen additional participants were added by using  
21 snowball sampling. In total, 491 participants were included and received an e-mail with an  
22 introductory message and a link to the survey. Following two e-mail reminders, 155  
23 participants completed the entire questionnaire (response rate 32%). However, a number of  
24 participants (n=32) no longer worked in healthcare or were unable to answer the questionnaire  
25 for various reasons (e.g. long sick-leave); after excluding these individuals from the original  
26 sample, the adjusted response rate was 34%. This study was conducted in accordance with the  
27 ethical code of research in healthcare [25], and the relevant ethical board acknowledged that  
28 no formal ethical approval was needed.  
29  
30  
31  
32  
33  
34  
35  
36  
37  
38

### 39 **Measures**

40 The questionnaire comprised a cover letter and 44 questions. The questions were based on  
41 three validated questionnaires on the evaluation of improvement initiatives [26], experience-  
42 based co-design [27], and customer involvement in service innovation [28]. The first  
43 questionnaire [26] was chosen because it examines how improvement projects can be  
44 evaluated, the second [27] investigates how to evaluate patient involvement in improvement  
45 projects specifically, and the third questionnaire [28] examines how to study radicality of  
46 improvements in a service area. Most of the questions were close-ended (examples can be  
47 seen in Table 1), with a few being open-ended, and covered the participants' demographic and  
48 background information, experiences of patient involvement in QI, and perceived results of  
49 QI. A pilot questionnaire was evaluated by a focus group consisting of five healthcare  
50  
51  
52  
53  
54  
55  
56  
57  
58  
59  
60

professionals from different healthcare organisations with training and practical experience in patient involvement in QI.

Seven items were used to operationalise the independent latent constructs of the phases of an improvement cycle (Table 1).

Table 1. Latent variables, items, and scale

| Latent variable/<br>Phase of<br>improvement cycle | Items                                                                                                                 | Acronym                       | Scale                                                             |
|---------------------------------------------------|-----------------------------------------------------------------------------------------------------------------------|-------------------------------|-------------------------------------------------------------------|
| <b>Capture experiences</b>                        | To what extent did patients/relatives participate in capturing experiences about the process?                         | Sharing experiences           | 5-point scale from 1 (to a small degree) to 5 (to a large degree) |
|                                                   | To what extent did patients/relatives participate in the identification of improvement areas?                         | Identifying improvement areas |                                                                   |
| <b>Identify and prioritise</b>                    | To what extent did patients/relatives participate in the planning of the quality improvement project?                 | Project planning              |                                                                   |
|                                                   | To what extent did patients/relatives participate in prioritising possible improvement areas?                         | Prioritising                  |                                                                   |
| <b>Taking actions</b>                             | To what extent did patient/relatives participate in generating improvement suggestions?                               | Generating suggestions        |                                                                   |
|                                                   | To what extent did patient/relatives participate in the implementation of improvement suggestions?                    | Implementing suggestions      |                                                                   |
| <b>Evaluate</b>                                   | To what extent did patient/relatives participate in the evaluation of the results of the quality improvement project? | Evaluating results            |                                                                   |

The dependent variable—radicality of improvement—was measured using a self-report single-item measure: ‘To what extent do you agree with the following statement: with the new way of working (resulting from the quality improvement project) we can meet patient needs that we did not try to meet earlier’. The item is rated on a 5-point scale ranging from 1 (completely disagree) to 5 (fully agree). Radicality hence focuses on the potential of the new way of working to meet prior unmet patient needs. This is similar to the definitions of radical innovations proposed by Tidd and Bessant [29] and Hertog [30].

### Data analysis

This study was exploratory and relied on a formative measure of radicality of improvement, for which the partial least squares (PLS) method is well suited [31]. Moreover, the PLS method can be used in situations where there could be strong correlations between items [28],



as could be the case in this study. The validity of the model was checked by examining the average variance extracted [32], which measures the relation between the variance captured by the construct and the variance caused by measurement error [33]. Good discriminant validity in PLS is established if the off-diagonal values are lower than the diagonal values [28].

## RESULTS

The participants in this study all had training as well as experience of QI involving patients, moreover 63.9 % of the participants reported that they had experiences as facilitators of projects with patient involvement. One participant reported on an improvement project involving patient conducted already in 1979, but most of the mentioned projects were conducted after year 2010. The participants represented a variety of professions; the distribution of gender and occupation of the participants is shown in Table 2.

Table 2. Characteristics of respondents (n=155)

| <b>Gender</b>          |             |
|------------------------|-------------|
| Female                 | 117 (75.5%) |
| Male                   | 36 (23.2%)  |
| Missing data           | 2 (1.3%)    |
| <b>Profession</b>      |             |
| Nurse                  | 71 (45.8%)  |
| Physician              | 19 (12.3%)  |
| Physiotherapist        | 5 (3.2%)    |
| Occupational therapist | 2 (1.3%)    |
| Social worker          | 1 (0.6%)    |
| Psychologist           | 2 (1.3%)    |
| Other                  | 51 (32.9%)  |
| Missing data           | 4 (2.6%)    |

Following standard procedures, the first step in assessing the measurement model focused on examining the loadings to assess the reliability of all measured items. The measured items, displayed in Table 1, are assessed to ensure that they apply correctly to their latent variable i.e. *capture experiences, identify and prioritise, taking action, or evaluate*. The recommended threshold value of 0.707 [28] was applied and all measured items had loadings that exceeded this threshold; hence, good reliability was confirmed.

Moreover, the results revealed that the discriminant validity of the model was sufficient, meaning that the latent variables (in this study Phase of improvement cycle) have stronger relationship to its own measured items (see Table 1) than to measured items related to another latent variable. The discriminant validity was evaluated by the average variance extracted (AVE) method, stating that the off-diagonal values should all be lower than the diagonal values [28]. Following thus method the model's latent constructs have good discriminant validity (see Table 3).

Table 3. Assessment of validity of the model (average variance extracted)

|                                | <b>Capture experiences</b> | <b>Evaluate</b> | <b>Identify and prioritise</b> | <b>Radicality</b> | <b>Taking action</b> |
|--------------------------------|----------------------------|-----------------|--------------------------------|-------------------|----------------------|
| <b>Capture experiences</b>     | 0.912                      |                 |                                |                   |                      |
| <b>Evaluate</b>                | 0.557                      | 1.000           |                                |                   |                      |
| <b>Identify and prioritise</b> | 0.603                      | 0.547           | 0.886                          |                   |                      |
| <b>Radicality</b>              | 0.457                      | 0.402           | 0.402                          | 1.000             |                      |
| <b>Taking action</b>           | 0.658                      | 0.619           | 0.706                          | 0.464             | 0.877                |

The model was estimated using PLS, Figure 1 displays the model and its four paths. From left to right, each path consists of the measured items and the associated latent variable, all modelled to assess the potential impact on the radicality of the solution resulting from the QI project.

- Insert Figure 1 about here.

Starting from top to bottom, the path coefficients were 0.220, 0.063, 0.200, and 0.121 for *capture experiences*, *identify and prioritise*, *taking action*, and *evaluate*, respectively. The coefficients reflect the magnitude of the potential impact on radicality, in other words the extent to which involvement in respective phase can lead to improvements that address previously unmet patient needs. This meant that the phases with most impact on radicality appeared to be *capture experiences* and *taking action*, whilst least impact was to be found in the phase of *identify and prioritise*.

1  
2  
3 Focusing the phases with most impact and looking at the underlying measured items, patient  
4 involvement in the *capture experience* phase means to include patients in the process of  
5 understanding (not only reporting on) patients' experiences and based on this involve patients  
6 in identification of improvement areas. In later parts of the improvement cycle, most impact is  
7 related to patient involvement in the phase *taking action*, meaning generating and  
8 implementing improvement suggestions.  
9  
10  
11  
12  
13  
14  
15

## 16 DISCUSSION

17  
18 The present study showed that the involvement of patients in QI might be a key to identifying  
19 and realising more radical solutions; however, the impact of patient involvement on radicality  
20 varied depending on the point at which patients were involved in a QI project. The impact of  
21 patient involvement on radicality appears to be highest in the phases of *capture experiences*  
22 and *taking action*. In contrast, patient involvement had the lowest impact on radicality in the  
23 *identify and prioritise* phase. These results are in accordance with previous studies in other  
24 disciplines that have systematically investigated the role of customer participation in  
25 development projects [35].  
26  
27  
28  
29  
30

31 The shift towards an outside-in perspective might explain why patient involvement influences  
32 radicality. Traditionally, QI has been carried out by staff within organisations. However, a  
33 central problem with this approach is that staff's insight into various solutions may be  
34 constrained by their own experience [36]. Furthermore, healthcare staff are trained in  
35 evidence-based medicine, where changes are more often incremental per se, and one first  
36 learns something and then applies it. It is therefore unlikely that a QI team with only  
37 healthcare staff will generate and implement ideas that conflict with their own assumptions.  
38 However, if QI teams interact with patients in the phases of *capturing experiences* and *taking*  
39 *action*, a new understanding of needs, anchored in patients' experiences rather than current  
40 healthcare practices, might be identified. This can lead to a sense of urgency and a tension for  
41 change (8). In such QI projects, patients' views would balance the inside-out perspective of  
42 staff.  
43  
44  
45  
46  
47  
48  
49  
50

51 However, as previously argued, patient involvement presents several challenges, such as the  
52 need for resources [12], and problems related to tokenism [13,14], validity [15], and  
53 competence [16]. Firstly, dividing an improvement cycle into distinct phases and identifying  
54 the stages in which patient involvement has the greatest impact on the radicality of the  
55  
56  
57  
58  
59  
60

1  
2  
3 improvement will enable the allocation of resources required for patient involvement to the  
4 most relevant phases. Secondly, minimising the risk of tokenism requires conditions for  
5 authentic patient involvement that can lead to a sense of urgency and a tension for change.  
6 This can best be provided in the *capturing experiences* and *taking action* phases, where this  
7 study shows that PI has most impact on radicality. Thus, patient involvement in these phases  
8 can help to reduce the risk of tokenism and our study, therefore, supports the notion that  
9 patients' active participation in practical QI projects lays a foundation for real impact.  
10 Thirdly, in contrast with previous studies suggesting validity problems when involving  
11 patients [15], this study measured healthcare professionals' perception of patients' influence  
12 and experience, and showed that patient involvement may increase the likelihood of finding a  
13 radical solution. The task of the QI team is to translate patients' expressed experiences and  
14 needs into solutions to meet these needs. Thus, the question is not to do merely what the  
15 patients say, but rather to actively listen to them and carefully consider the possible  
16 alternatives. This might also explain why patient involvement in the *identify and prioritise*  
17 phase was not so strongly linked to radicality, as these tasks are better performed by the QI  
18 team. Fourthly, concerns have been raised as to the competence of patients to contribute to  
19 QI. This can be due both to a lack of professional knowledge [12] and to the sharing of power,  
20 which challenges current power relations [13,17]. According to Gaventa and Cornwall [37]  
21 the relationship between power and knowledge can be regarded from at least three  
22 perspectives: (1) knowledge owned by powerful experts and transferred to the powerless as  
23 truth yielded by objective research; (2) knowledge as controlled by the powerful, where the  
24 powerless may be occasionally invited to produce and act upon a set agenda of knowledge  
25 creation; and (3) an emphasis on participation in the knowledge production, where co-  
26 production builds greater awareness and self-consciousness of capacities for action [37].  
27 According to this, only in the third perspective can healthcare staff perceive patient's  
28 perspectives as equally important, and knowledge about what needs to be improved as co-  
29 created without a set agenda. Having such an approach means that the patient is regarded as a  
30 capable person with unique knowledge [38] and a partner in developing care through  
31 participation in QI. The findings in our study support this view while still respecting the  
32 professional knowledge held by healthcare staff (i.e. given that the *identify and prioritise*  
33 phase had the lowest impact on radicality, it should be developed by professionals based on  
34 their broader healthcare experience).

35  
36  
37  
38  
39  
40  
41  
42  
43  
44  
45  
46  
47  
48  
49  
50  
51  
52  
53  
54  
55  
56  
57  
58  
59  
60  
The findings in this study have practical implications for improvement projects that involve  
patients. A particularly important implication of this study is that QI teams should consider

1  
2  
3 involving patients, especially in the *capture experiences* and *taking action* phases of a project,  
4 as this will likely influence the radicality of the solutions. However, as healthcare is co-  
5 created and produced within the interactions between patients and health professionals [12],  
6 the staff's perspective should be balanced with that of patients. As discussed above, power  
7 and ethics could be a barrier to forging a true partnership between patients and staff, but our  
8 results can nevertheless help by defining when patient involvement is most beneficial for  
9 radicality. At the same time, this knowledge can help to save resources spent on patient  
10 involvement by identifying which phases are best handled by healthcare professionals alone.

11 This study has several limitations. Firstly, it clarifies the effects of patient involvement in QI  
12 initiatives in the specific context of Swedish healthcare. Secondly, as patient involvement in  
13 QI is a relatively new practice, the sampling strategy involved choosing participants who were  
14 trained and had experience in QI. When these practices have been in use for a longer time and  
15 by more healthcare professionals, a different sampling strategy might be used. Furthermore, it  
16 would be of interest for future research to study how the impact of patient involvement on  
17 radicality is affected by the type of healthcare setting, such as acute vs. chronic care, or  
18 standardised simple procedures vs. complex care. Another potential area for future research  
19 would be to identify what methods could be used to support patient involvement in the  
20 different phases of QI. For instance, well established methods such as concept mapping [39],  
21 where there is a clear distinction between stakeholders' and researchers' responsibilities  
22 within the cycle, could be tested in patient involvement in healthcare.  
23  
24  
25  
26  
27  
28  
29  
30  
31  
32  
33  
34  
35

## 36 **Conclusion**

37 In conclusion, before considering involving patients in improvement initiatives, it is essential  
38 to decide how and when to involve them. Consideration should be given to the phase in which  
39 patients have the potential to co-create radical and valuable insights for improvement  
40 initiatives. This study showed that patient involvement has the greatest impact on radicality in  
41 the phases *capture experiences* and *taking action*, a moderate impact in the *evaluate* phase,  
42 and the lowest impact on the *identify and prioritise* phase.  
43  
44  
45  
46  
47  
48

## 49 **Contributors**

50 IG, ME and SG developed and directed the survey. IG and ME performed the statistical  
51 analysis. IG, ME and FS designed this specific study and did the draft and editing of the  
52 manuscript. All authors approved the manuscript.  
53  
54  
55  
56  
57  
58  
59  
60

## Competing interests

None declared.

## Funding

This research received no specific grant from any funding agency in the public, commercial or not-for-profit sectors.

## Data sharing statement

The database is held at the host institution and analysis and access to the data are limited to on-site access. More detailed analysis results are available on request to the corresponding author.

## REFERENCES

- 1 Mohrman S, Shani AB, McCracken A. Organizing for sustainable healthcare. The emerging global challenge. In: Mohrman S, Shani AB, eds. *Organizing for sustainability* (Vol. 2). Bingley, UK: Emerald 2012:1–39.
- 2 Ocloo J, Matthews R. From tokenism to empowerment: progressing patient and public involvement in healthcare improvement. *BMJ Qual Safety* 2016;25(8):626–32.  
doi: 10.1136/bmjqs-2015-004839
- 3 Brett J, Staniszevska S, Mockford C, et al. Mapping the impact of patient and public involvement on health and social care research: a systematic review. *Health Expect* 2014;17(5):637–650. doi: [10.1111/j.1369-7625.2012.00795.x](https://doi.org/10.1111/j.1369-7625.2012.00795.x)
- 4 Berwick DM. The science of improvement. *JAMA* 2008;299(10):1182–1184.  
doi: 10.1001/jama.299.10.1182.
- 5 Charmel P, Frampton S. Building the business case for patient-centered care. *Health Finan Manag* 2008;62(80):1–5.
- 6 MacMillan I, McCaffrey ML, Van Wijk G. Competitor's responses to easily imitated new products: Exploring commercial banking product introductions. *Strat Mgmt J* 1985;6:75–86.  
doi: 10.1002/smj.4250060106
- 7 Taran Y, Boer H, Lindgren P. Theory building—towards an understanding of business model innovation processes. In: Proceedings of the international DRUID-DIME academy winter conference, economics and management of innovation, technology and organizational change 2009.
- 8 Elg M, Engström J, Witell L, et al. Co-creation and learning in health-care service development. *J Serv Manag* 2012;23(3):328–43.  
<https://doi.org/10.1108/09564231211248435>
- 9 Spinuzzi C. The methodology of participatory design. *Technol Commun* 2005;52(2):163–74.
- 10 Armstrong N, Herbert G, Aveling E-L, et al. Optimizing patient involvement in quality improvement. *Health Expect* 2013;16(3):e36–47. doi: 10.1111/hex.12039.

- 1  
2  
3 11 Osborne SP, Strokosch K. It takes two to tango? Understanding the Co-production of  
4 public services by integrating the services management and public administration  
5 perspectives. *British Journal of Management* 2013;24(S1). doi: 10.1111/1467-8551.12010  
6  
7  
8 12 Batalden M, Batalden P, Margolis P, et al. Coproduction of healthcare service. *BMJ Qual*  
9 *Saf* 2016;25(7):509–17. doi: 10.1136/bmjqs-2015-004315.  
10  
11  
12 13 Eikeland, O. (2006). Condensing ethics and action research: Extended review  
13 article. *Action Research*, 2006;4(1):37–47.  
14  
15  
16 14 Snape D, Kirkham J, Preston J, et al. Exploring areas of consensus and conflict around  
17 values underpinning public involvement in health and social care research: a modified Delphi  
18 study. *BMJ open*, 2014;4(1):e004217. doi: 10.1136/bmjopen-2013-004217.  
19  
20  
21 15 Hubbard G, Kidd L, Donaghy E, at al. A review of literature about involving people  
22 affected by cancer in research, policy and planning and practice. *Patient Educ Couns*  
23 2007;65(1):21–33. doi: [10.1016/j.pec.2006.02.009](https://doi.org/10.1016/j.pec.2006.02.009)  
24  
25  
26 16 Batalden PB, Stoltz P. A framework for the continual improvement of health care; building  
27 and applying professional and improvement knowledge to test changes in daily work. *Joint*  
28 *Comm J Qual Improv* 1993;19(10):432–52.  
29  
30  
31 17 Smith F, Wallengren C, Öhlén J. Participatory design in education materials in a health  
32 care context. *Action Research* 2016;15(3):310–36.  
33  
34 <https://doi.org/10.1177/1476750316646832>  
35  
36  
37 18 Iedema R, Merrick E, Piper D, et al. Codesigning as a discursive practice in emergency  
38 health services: the architecture of deliberation. *J Appl Behav Sci* 2010;46(1):73–91.  
39 <https://doi.org/10.1177/0021886309357544>  
40  
41  
42 19 Gustavsson S. Improvements in neonatal care; using experience-based co-design. *Int J*  
43 *Health Care Qual Assur* 2014;27(5):427–438. doi: 10.1108/IJHCQA-02-2013-0016  
44  
45  
46 20 Armstrong N, Herbert G, Aveling E-L, et al. Optimizing patient involvement in quality  
47 improvement, *Health Expect* 2013;16(3):e36–e47. doi: [10.1111/hex.12039](https://doi.org/10.1111/hex.12039)  
48  
49  
50 21 Mockford C, Staniszewska S, Griffiths F, et al. The impact of patient and public  
51 involvement on UK NHS health care: a systematic review. *Int J Qual Health Care*  
52 2011;24(1):28–38. doi: 10.1093/intqhc/mzr066.  
53  
54  
55  
56  
57  
58  
59  
60



1  
2  
3 22 Wiig S, Storm M, Aase K, et al. Investigating the use of patient involvement and patient  
4 experience in quality improvement in Norway: rhetoric or reality? *BMC Health Serv Res*  
5 2013;13:206. doi: 10.1186/1472-6963-13-206.  
6

7  
8 23 Bate P, Robert G. Toward more user-centric OD: Lessons from the field of experience-  
9 based design and a case study. *J Appl Behav Sci* 2007;43(41):41–66.  
10 <https://doi.org/10.1177/0021886306297014>  
11

12  
13 24 Elg M, Witell L, Poksinska B, et al. Solicited diaries as a means for involving patients in  
14 development of healthcare services. *Int J Qual Serv Sci* 2011;3(2):128–45.  
15 <https://doi.org/10.1108/17566691111146050>  
16

17  
18 25 Codex. Regler och riktlinjer för forskning. <http://www.codex.uu.se/> (accessed 1 March  
19 2015).  
20

21  
22 26 Andersson A-C, Elg M, Perseius K-I, et al. Evaluating a questionnaire to measure  
23 improvement initiatives in Swedish healthcare. *BMC Health Serv Res* 2013;13:48  
24 doi:10.1186/1472-6963-13-48  
25

26  
27 27 Donetto S, Tsianakas V, Robert G. Using experience-based Co-design (EBCD) to improve  
28 the quality of healthcare: mapping where we are now and establishing future directions.  
29 London: King's College London 2014.  
30

31  
32 28 Gustafsson A, Kristensson P, Witell L. Customer co-creation in service innovation: a  
33 matter of communication? *J Serv Manag* 2012;23(3):311–27.  
34 <https://doi.org/10.1108/09564231211248426>  
35

36  
37 29 Tidd J, Bessant J. Managing Innovation. Integrating Technological, Market and  
38 Organisational Change. Chichester, UK: John Wiley and Sons 2009.  
39

40  
41 30 Hertog, P, Gallouj, F, Segers, J. Measuring innovation in a 'low-tech' service industry: the  
42 case of the Dutch hospitality industry. *The Service Industries Journal* 2011;31(9):1429–1449.  
43 doi: 10.1080/02642060903576084  
44

45  
46 31 Cocosila M, Archer N. Perceptions of chronically ill and healthy consumers about  
47 electronic personal health records: a comparative empirical investigation. *BMJ Open*  
48 2014;4(7):e005304–e005304. doi: 10.1136/bmjopen-2014-005304  
49

50  
51 32 Fornell C, Larcker D. Evaluating structural equation models with unobservable variables  
52 and measurement errors. *J Marketing Res* 1981;18(1):39–50. doi: 10.2307/3151312  
53

- 1  
2  
3 33 Fornell C, Cha J. Partial Least Squares. In: Bagozzi RP, ed. *Advanced methods of*  
4 *marketing research*. Cambridge, MA: Blackwell 1994:52–78  
5  
6 34 Ferlie EB, Shortell SM. Improving the quality of health care in the United Kingdom and  
7 *the united states: a framework for change*. *Milbank Q* 2001;79(2):281–315.  
8  
9  
10 35 Chang W, Taylor SA. The effectiveness of customer participation in new product  
11 *development: a meta-analysis*. *J Market* 2016;80(1):47–64.  
12  
13 doi: <http://dx.doi.org/10.1509/jm.14.0057>  
14  
15 36 Von Hippel, E. Lead users: a source of novel product concepts. *Management Science*  
16 1986;32(7):791–805. <https://doi.org/10.1287/mnsc.32.7.791>  
17  
18  
19 37 Gaventa J, Cornwall A. Power and Knowledge. In: Reason P, Bradbury H, eds. *The Sage*  
20 *handbook of action research: Participative inquiry and practice*. Cornwall, UK: Sage  
21 *Publications* 2008:172–89.  
22  
23  
24 38 Ekman I, Swedberg K, Taft C, et al. Person-centered care—Ready for prime time. *Eur J*  
25 *Cardiovasc Nurs* 2011;10(4), 248–251. doi: 10.1016/j.ejcnurse.2011.06.008  
26  
27  
28 39 Burke JG, O’Campo P, Peak GL, et al. An introduction to concept mapping as a  
29 *participatory public health research method*. *Qual Health Res* 2005;15(10):1392–1410.  
30  
31  
32 doi: [10.1177/1049732305278876](http://dx.doi.org/10.1177/1049732305278876)  
33  
34  
35  
36  
37  
38

39 Figure 1. Model of radicality of improvement. Latent variables are the phases of an improvement project:  
40 *capture experiences, identify and prioritise, taking action, and evaluate*.  
41  
42  
43  
44  
45  
46  
47  
48  
49  
50  
51  
52  
53  
54  
55  
56  
57  
58  
59  
60

1  
2  
3  
4  
5  
6  
7  
8  
9  
10  
11  
12  
13  
14  
15  
16  
17  
18  
19  
20  
21  
22  
23  
24  
25  
26  
27  
28  
29  
30  
31  
32  
33  
34  
35  
36  
37  
38  
39  
40  
41  
42  
43  
44  
45  
46  
47  
48  
49  
50  
51  
52  
53  
54  
55  
56  
57  
58  
59  
60

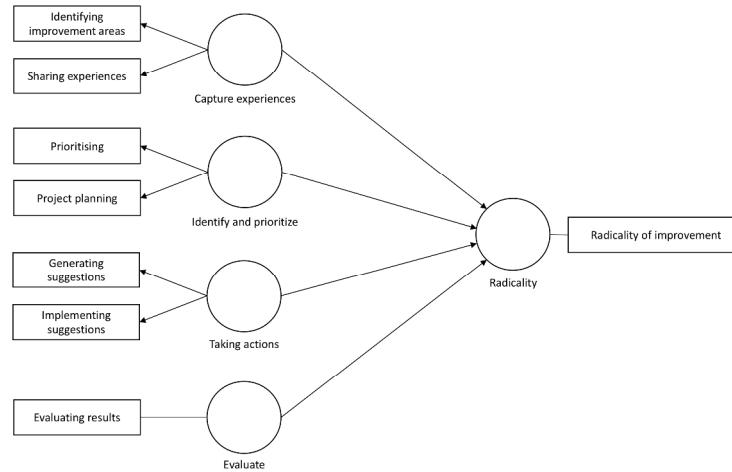

Figure 1. Model of radicality of improvement. Latent variables are the phases of an improvement project: capture experiences, identify and prioritise, taking action, and evaluate.

297x209mm (300 x 300 DPI)

# BMJ Open

## Exploring the phase for highest impact on radicality—a cross-sectional study of patient involvement in quality improvement in Swedish health care

|                                 |                                                                                                                                                                                                                                                                                                                                                    |
|---------------------------------|----------------------------------------------------------------------------------------------------------------------------------------------------------------------------------------------------------------------------------------------------------------------------------------------------------------------------------------------------|
| Journal:                        | <i>BMJ Open</i>                                                                                                                                                                                                                                                                                                                                    |
| Manuscript ID                   | bmjopen-2018-021958.R1                                                                                                                                                                                                                                                                                                                             |
| Article Type:                   | Research                                                                                                                                                                                                                                                                                                                                           |
| Date Submitted by the Author:   | 24-May-2018                                                                                                                                                                                                                                                                                                                                        |
| Complete List of Authors:       | Gremyr, I; Chalmers University of Technology, Technology Management and Economics<br>Elg, Mattias ; Linköping University, Department of Management and Engineering<br>Smith, Frida; Chalmers University of Technology, Department of Technology Management and Economics; Regional Cancer Centre West<br>Gustavsson, Susanne; Skaraborg's hospital |
| <b>Primary Subject Heading</b>: | Health services research                                                                                                                                                                                                                                                                                                                           |
| Secondary Subject Heading:      | Health services research, Medical management, Patient-centred medicine                                                                                                                                                                                                                                                                             |
| Keywords:                       | Quality in health care < HEALTH SERVICES ADMINISTRATION & MANAGEMENT, Organisational development < HEALTH SERVICES ADMINISTRATION & MANAGEMENT, Change management < HEALTH SERVICES ADMINISTRATION & MANAGEMENT                                                                                                                                    |
|                                 |                                                                                                                                                                                                                                                                                                                                                    |

SCHOLARONE™  
Manuscripts

1  
2  
3 Exploring the phase for highest impact on radicality—a cross-  
4 sectional study of patient involvement in quality improvement  
5  
6  
7  
8  
9  
10 in Swedish health care  
11  
12  
13  
14  
15  
16

17 **Authors:**

18  
19  
20 Ida Gremyr, Professor<sup>1</sup>, Mattias Elg, Professor<sup>2</sup>, Frida Smith, PhD, Quality manager<sup>1,3</sup>, Susanne  
21 Gustavsson, PhD, Nursing director<sup>4</sup>  
22  
23  
24  
25

26  
27 <sup>1</sup> Department of Technology Management and Economics, Chalmers University of  
28 Technology, Gothenburg, Sweden

29 <sup>2</sup> Department of Management and Engineering, Linköping University, Linköping, Sweden

30 <sup>3</sup> Regional Cancer Centre West, Gothenburg, Sweden

31 <sup>4</sup> Skaraborg's Hospital, Skövde, Sweden  
32  
33

34 **Corresponding author:**

35 Ida Gremyr

36 Department of Technology Management

37 and Economics

38 Chalmers University of Technology

39 SE-412 96 Gothenburg

40 Sweden  
41  
42  
43  
44  
45  
46

47 e-mail: [ida.gremyr@chalmers.se](mailto:ida.gremyr@chalmers.se)

48  
49 Phone: +46 31 772 8182

50 Fax: +46 31 772 5944  
51  
52  
53

54 **Keywords:** Quality in health care, Organisational development, Change management  
55  
56  
57  
58  
59  
60

1  
2  
3  
4  
5 **Word count of manuscript** (excl. title page, abstract, references, and tables/figures): 3474  
6  
7  
8  
9  
10  
11  
12  
13  
14  
15  
16  
17  
18  
19  
20  
21  
22  
23  
24  
25  
26  
27  
28  
29  
30  
31  
32  
33  
34  
35  
36  
37  
38  
39  
40  
41  
42  
43  
44  
45  
46  
47  
48  
49  
50  
51  
52  
53  
54  
55  
56  
57  
58  
59  
60

For peer review only

# Exploring the phase for highest impact on radicality—a cross-sectional study of patient involvement in quality improvement in Swedish health care

## ABSTRACT

**Objectives:** Involving patients in quality improvement is often suggested as a critical step for improving healthcare processes. However, this comes with challenges related to resources, tokenism, validity, and competence. Therefore, to optimise the use of available resources, there is a need to understand at what stage in the improvement cycle patient involvement is most beneficial. Thus, the purpose of this study was to identify the phase of an improvement cycle in which patient involvement had the highest impact on radicality of improvement.

**Design:** An exploratory cross-sectional survey was used.

**Setting and methods:** A questionnaire was completed by 155 Swedish healthcare professionals (response rate 34%) who had trained and had experience in patient involvement in quality improvement. Based on their replies, the impact of patient involvement on radicality in various phases of the improvement cycle was modelled using the partial least squares method.

**Results:** Patient involvement in quality improvement might help to identify and realise innovative solutions; however, there is variation in the impact of patient involvement on perceived radicality depending on the phase in which patients become involved. The highest impact on radicality was observed in the phases of *capture experiences* and *taking action*, while a moderate impact was observed in the *evaluate* phase. The lowest impact was observed in the *identify and prioritise* phase.

**Conclusions:** Involving patients in improvement projects can enhance the quality of care and help to identify radically new ways of delivering care. This study shows that it is possible to suggest at what point in an improvement cycle patient involvement has the highest impact, which will enable more efficient use of the resources available for patient involvement.

**Keywords:** patient involvement, improvement project, quality management, radicality

## Strengths and limitations of the study:

- The research team has practical and academic experience from both health care and quality improvement
- Radicality has been sparsely used as a measure for patient involvement in quality improvement
- The model allows for a prioritizing of when to involve patients in improvement projects
- Patients were not asked the same questions as health care professionals to validate results
- How the impact of patient involvement on radicality might be affected by the type of healthcare setting was not examined

## BACKGROUND

Healthcare today faces an imminent challenge originating from the paradox of survival—namely, a higher demand for care without additional budget [1]. Stretching available resources to cover more individuals while simultaneously pursuing new possibilities for treatment often using expensive methods has demanded radical changes in the organisation and improvement of existing healthcare systems. As a response to this challenge, patient involvement in quality improvement (QI) has increasingly been viewed as a means to generate more radical ideas for new healthcare services [2-5]. Radicality can be defined as the potential or novelty of a QI idea for meeting new needs of patients, thus generating solutions or innovations that range from incremental (‘the same but better’) to radical (‘really different’) [6,7]. Note that radicality does not necessarily refer to solutions that are new to the world, but solutions that allow for addressing previously unmet patient needs within specific contexts.

The notion of patient involvement includes a variety of influences that has led to its development, including democratisation, challenges to professional power, and welfare rights social movements. It is also believed that patient involvement can lead to radically new and more resource-efficient ways of delivering healthcare [1]. These changes do not necessarily need to be on a large scale, it is often small things that can be questioned and pointed out by patients that can lead to effective new ways of working. To generate radical as opposed to incremental innovation, there needs to be



1  
2  
3 a sense of urgency and a tension for change [8]. The fundament for the creation of a sense of  
4 urgency is a disconfirmation of taken-for-granted implicit assumptions. Potentially, this leads to  
5 organisational members experiencing the current conditions as inadequate and developing  
6 motivation for change. Utilising patients' experiences wisely (i.e. for the right purpose at the right  
7 time) can contribute to such a tension for change. For example, methods that involve customers in  
8 design activity [9] emphasise the need for coping with conflicting interests; thus, when staff is  
9 exposed to patients' first-hand experiences, this provides an insight into the need for change, i.e. it  
10 intensifies the tension for change. However, the impact of patient involvement on radicality per se  
11 has been questioned, and arguments have been put forth that patient involvement lends itself to  
12 more incremental rather than radical change [9].

13  
14 Patient involvement has been criticised for being exclusive and cosmetic, and for tokenism  
15 [2,10,11]. Furthermore, efforts to achieve greater involvement have been patchy and slow as  
16 healthcare QI personnel experience several obstacles and sometimes even do not value patient  
17 involvement at all. It cannot be neglected that patient involvement imposes challenges in terms of  
18 resources [12], tokenism [13,14], validity [15], and competence [16]. Firstly, involving patients is  
19 time- and resource-consuming [15], and requires careful management to reach its full potential  
20 [10]. Secondly, if patients are asked but not listened to, tokenism might ensue in order to simply  
21 'tick the boxes' [14], with hierarchical structures and asymmetrical patterns of power remaining  
22 unchallenged [13,17]. Thirdly, there might be validity issues with patient involvement studies and  
23 therefore, more rigorous evidence of their outcome is desirable (15), for such studies to be  
24 confirmed and accepted as high-quality research. Finally, in terms of competence, Batalden et al.  
25 [12] stressed that each level of shared work in co-creation between staff and patients requires  
26 specific knowledge of the subject matter, know-how, dispositions, and behaviours, thus pointing  
27 to a need for healthcare competence in QI work.

28  
29 Despite these challenges, there are promising examples of patient involvement in QI, for example  
30 in acute care [18], development of patient education materials [17], and neonatal care [19]. The  
31 positive effects of patient involvement include enabling patients to act as intermediaries between  
32 other patients and clinicians, which may help to convince healthcare professionals of a need for  
33 change [10]. Additionally, patient involvement may improve care efficiency and decrease costs,  
34 among other aspects [10]. However, overall, there is rather poor-quality evidence and few  
35 measurements to evaluate the impact of patient involvement [10, 20,21].

1  
2  
3 Thus, there are contradictory views on the potential of patient involvement to contribute to radical  
4 improvements in healthcare. A reason for this controversy lies in the uncertainty regarding how to  
5 work with patient involvement [2], in particular in terms of the most beneficial stage to involve  
6 patients in QI. Accordingly, the purpose of this study was to identify the phase of an improvement  
7 cycle in which patient involvement had the highest impact on the radicality of the improvement.  
8 This will aid in the optimisation of resource allocation to best support the contributions of patient  
9 involvement to radically new and improved ways of organising and delivering healthcare. For this  
10 purpose, we evaluated *when* patient involvement is most beneficial in an improvement cycle, which  
11 we divided into four phases according to the work of Bate and Robert [22]: *capture experiences*,  
12 *identify and prioritise*, *taking action*, and *evaluate*. These four phases are also generally found in  
13 other forms of patient involvement in quality improvement cycles [8]. The first phase involves  
14 capturing patient experiences, e.g. through interviews, films, diaries, etc. The second phase  
15 involves identifying and prioritising areas for improvement in the care process. Active involvement  
16 in QI is considered to comprise the third phase, *taking action*, while in the fourth phase, *evaluate*,  
17 patients can be involved in the follow-up and evaluation of improvements [22,23].  
18  
19  
20  
21  
22  
23  
24  
25  
26  
27  
28  
29

## 30 **METHODS**

### 31 **Sample**

32  
33 Data were collected through an online cross-sectional survey using a web-based survey tool  
34 provided by fluidsurveys.com. The original sample consisted of 472 participants who had training  
35 and practical experience in patient involvement in QI. The training ranged from a two-week course  
36 to a two-year part-time university education. All training consisted of a combination of theoretical  
37 elements (focusing QI and patient involvement in healthcare) as well as practical improvement  
38 projects. Regarding the practical experience of QI and patient involvement (besides the projects  
39 being part of the training), the experience ranged from one to more than 10 completed projects; the  
40 projects focusing e.g. the eating environment at hospitals, decreasing compulsory care in  
41 psychiatry, and improvements in cancer care. The sampling frame was given by access to e-mail  
42 lists from three of the largest providers of courses on QI in healthcare, the e-mail lists included all  
43 their previous participants  
44  
45  
46  
47  
48  
49  
50  
51  
52

53 The participants came several Swedish healthcare regions, responsible for the provision of primary  
54 care, healthcare, dental care, etc. in a specific geographical area. Nineteen additional participants  
55  
56  
57  
58  
59  
60

1  
2  
3 were added by using snowball sampling. In total, 491 participants were included and received an  
4 e-mail with an introductory message and a link to the survey. Following two e-mail reminders, 155  
5 participants completed the entire questionnaire (response rate 32%). However, a number of  
6 participants (n=32) no longer worked in healthcare or were unable to answer the questionnaire for  
7 various reasons (e.g. long sick-leave); after excluding these individuals from the original sample,  
8 the adjusted response rate was 34%. This study was conducted in accordance with the ethical code  
9 of research in healthcare [24], and the *Regional Ethical Review Board in Gothenburg* granted  
10 exemption from a formal ethical approval.  
11  
12  
13  
14  
15  
16  
17

### 18 **Patient and public involvement statement**

19 Patients were not included in the sampling for this study. It is considered appropriate [25,26] for  
20 evaluation of improvement projects to choose people with a long track record of experience with a  
21 specific process, in our case the QI-staff. Patients have invaluable knowledge of the experience  
22 from other dimensions, but have less knowledge about the organization, and what can be  
23 considered as radical might thereby have a completely different meaning than for the QI personnel  
24 and should therefore not be compared.  
25  
26  
27  
28  
29  
30

### 31 **Measures**

32 The questionnaire comprised a cover letter and 44 questions. The questions were based on three  
33 validated questionnaires on the evaluation of improvement initiatives [27], experience-based co-  
34 design [28], and customer involvement in service innovation [29]. The first questionnaire [27] was  
35 chosen because it examines how improvement projects can be evaluated, the second [28]  
36 investigates how to evaluate patient involvement in improvement projects specifically, and the  
37 third questionnaire [29] examines how to study radicality of improvements in a service area. Most  
38 of the questions were close-ended (examples can be seen in Table 1), with a few being open-ended,  
39 and covered: the participants' demographic and background information, motivation and  
40 organisation of improvement projects, experiences of patient involvement in QI, the organisational  
41 culture, and the perceived results of patient involvement in QI. A pilot questionnaire was evaluated  
42 by a focus group consisting of five healthcare professionals from different healthcare organisations  
43 with training and practical experience in patient involvement in QI. This contributed to  
44 clarifications of questions and instructions in the survey, and ensured an understanding of the  
45 survey and its item among the focus group participants.  
46  
47  
48  
49  
50  
51  
52  
53  
54  
55  
56  
57  
58  
59  
60

Seven items were used to operationalise the independent latent constructs of the phases of an improvement cycle (Table 1).

Table 1. Latent variables, items, and scale

| Latent variable/<br>Phase of<br>improvement cycle | Items                                                                                                                 | Acronym                       | Scale                                                             |
|---------------------------------------------------|-----------------------------------------------------------------------------------------------------------------------|-------------------------------|-------------------------------------------------------------------|
| <b>Capture experiences</b>                        | To what extent did patients/relatives participate in capturing experiences about the process?                         | Sharing experiences           | 5-point scale from 1 (to a small degree) to 5 (to a large degree) |
|                                                   | To what extent did patients/relatives participate in the identification of improvement areas?                         | Identifying improvement areas |                                                                   |
| <b>Identify and prioritise</b>                    | To what extent did patients/relatives participate in the planning of the quality improvement project?                 | Project planning              |                                                                   |
|                                                   | To what extent did patients/relatives participate in prioritising possible improvement areas?                         | Prioritising                  |                                                                   |
| <b>Taking actions</b>                             | To what extent did patient/relatives participate in generating improvement suggestions?                               | Generating suggestions        |                                                                   |
|                                                   | To what extent did patient/relatives participate in the implementation of improvement suggestions?                    | Implementing suggestions      |                                                                   |
| <b>Evaluate</b>                                   | To what extent did patient/relatives participate in the evaluation of the results of the quality improvement project? | Evaluating results            |                                                                   |

The dependent variable—radicality of improvement—was measured using a self-report single-item measure: ‘To what extent do you agree with the following statement: with the new way of working (resulting from the quality improvement project) we can meet patient needs that we did not try to meet earlier’, building upon Cooper [30]. The item is rated on a 5-point scale ranging from 1 (completely disagree) to 5 (fully agree). Radicality hence focuses on the potential of the new way of working to meet prior unmet patient needs. This is similar to the definitions of radical innovations proposed by Tidd and Bessant [31] and Hertog [32].

### Data analysis

This study was exploratory and relied on a formative measure of radicality of improvement, for which the partial least squares (PLS) method is well suited [33]. Moreover, the PLS method can be

used in situations where there could be strong correlations between items [29], as could be the case in this study. The validity of the model was checked by examining the average variance extracted [34], which measures the relation between the variance captured by the construct and the variance caused by measurement error [35]. Good discriminant validity in PLS is established if the off-diagonal values are lower than the diagonal values [29].

## RESULTS

The participants in this study all had training as well as experience of QI involving patients, moreover 63.9 % of the participants reported that they had experiences as facilitators of projects with patient involvement. One participant reported being involved in an improvement project involving patient conducted already in 1979, but most of the mentioned projects were conducted after year 2010. The participants represented a variety of professions; the distribution of gender and occupation of the participants is shown in Table 2. The distributions of gender and professions are in line with the total distributions in Swedish healthcare.

Table 2. Characteristics of respondents (n=155)

|                                                                            |             |
|----------------------------------------------------------------------------|-------------|
| <b>Gender</b>                                                              |             |
| Female                                                                     | 117 (75.5%) |
| Male                                                                       | 36 (23.2%)  |
| Missing data                                                               | 2 (1.3%)    |
| <b>Profession</b>                                                          |             |
| Nurse                                                                      | 71 (45.8%)  |
| Physician                                                                  | 19 (12.3%)  |
| Physiotherapist                                                            | 5 (3.2%)    |
| Occupational therapist                                                     | 2 (1.3%)    |
| Social worker                                                              | 1 (0.6%)    |
| Psychologist                                                               | 2 (1.3%)    |
| Other, e.g. public health scientists, psychotherapist, and quality manager | 51 (32.9%)  |
| Missing data                                                               | 4 (2.6%)    |

Following standard procedures, the first step in assessing the measurement model focused on examining the loadings to assess the reliability of all measured items. The measured items,

1  
2  
3 displayed in Table 1, are assessed to ensure that they apply correctly to their latent variable i.e.  
4 *capture experiences, identify and prioritise, taking action, or evaluate*. The recommended  
5 threshold value of 0.707 [29] was applied and all measured items had loadings that exceeded this  
6 threshold; hence, good reliability was confirmed.  
7  
8

9  
10 Moreover, the results revealed that the discriminant validity of the model was sufficient, meaning  
11 that the latent variables (in this study Phase of improvement cycle) have stronger relationship to its  
12 own measured items (see Table 1) than to measured items related to another latent variable. The  
13 discriminant validity was evaluated by the average variance extracted (AVE) method, stating that  
14 the off-diagonal values should all be lower than the diagonal values [29]. Following this method  
15 the model's latent constructs have good discriminant validity (see Table 3).  
16  
17  
18  
19  
20  
21  
22  
23  
24  
25  
26

27 Table 3. Assessment of validity of the model (average variance extracted)

|                                | <b>Capture experiences</b> | <b>Evaluate</b> | <b>Identify and prioritise</b> | <b>Radicality</b> | <b>Taking action</b> |
|--------------------------------|----------------------------|-----------------|--------------------------------|-------------------|----------------------|
| <b>Capture experiences</b>     | 0.912                      |                 |                                |                   |                      |
| <b>Evaluate</b>                | 0.557                      | 1.000           |                                |                   |                      |
| <b>Identify and prioritise</b> | 0.603                      | 0.547           | 0.886                          |                   |                      |
| <b>Radicality</b>              | 0.457                      | 0.402           | 0.402                          | 1.000             |                      |
| <b>Taking action</b>           | 0.658                      | 0.619           | 0.706                          | 0.464             | 0.877                |

28  
29  
30  
31  
32  
33  
34  
35  
36  
37  
38  
39  
40  
41  
42  
43  
44  
45 The model was estimated using PLS, Figure 1 displays the model and its four paths. From left to  
46 right, each path consists of the measured items and the associated latent variable, all modelled to  
47 assess the potential impact on the radicality of the solution resulting from the QI project.  
48  
49

50  
51  
52 - Insert Figure 1 about here.  
53

54 Starting from top to bottom, the path coefficients were 0.220, 0.063, 0.200, and 0.121 for *capture*  
55 *experiences, identify and prioritise, taking action, and evaluate*, respectively. The coefficients  
56  
57  
58  
59

1  
2  
3 reflect the magnitude of the potential impact on radicality, in other words the extent to which  
4 involvement in respective phase can lead to improvements that address previously unmet patient  
5 needs. This meant that the phases with most impact on radicality appeared to be *capture*  
6 *experiences* and *taking action*, whilst least impact was to be found in the phase of *identify and*  
7 *prioritise*.  
8  
9

10  
11 Focusing the phases with most impact and looking at the underlying measured items, patient  
12 involvement in the *capture experience* phase means to include patients in the process of  
13 understanding (not only reporting on) patients' experiences and based on this involve patients in  
14 identification of improvement areas. In later parts of the improvement cycle, most impact is related  
15 to patient involvement in the phase *taking action*, meaning generating and implementing  
16 improvement suggestions.  
17  
18  
19  
20  
21  
22  
23  
24  
25

## 26 DISCUSSION

27  
28 The present study showed that the involvement of patients in QI might be a key to identifying and  
29 realising more radical solutions. However, the impact of patient involvement on radicality varied  
30 depending on the point at which patients were involved in a QI project. The impact of patient  
31 involvement on radicality appears to be highest in the phases of *capture experiences* and *taking*  
32 *action*. In contrast, patient involvement had the lowest impact on radicality in the *identify and*  
33 *prioritise* phase. These results are in accordance with previous studies in other disciplines that have  
34 systematically investigated the role of customer participation in development projects [36]. The  
35 finding should not be interpreted as a non-existing need to involve patient in those two latter phases.  
36 The results point to a relatively higher influence of patient involvement in the phases of *capture*  
37 *experiences* and *taking action* when focusing on radicality.  
38  
39  
40  
41  
42  
43  
44  
45

46 The shift towards an outside-in perspective might explain why patient involvement influences  
47 radicality. Traditionally, QI has been carried out by staff within organisations. However, a central  
48 problem with this approach is that staff's insight into various solutions may be constrained by their  
49 own experience [37]. Furthermore, healthcare staff are trained in evidence-based medicine, where  
50 changes are more often incremental per se, and one first learns something and then applies it. It is  
51 therefore unlikely that a QI team with only healthcare staff will generate and implement ideas that  
52  
53  
54  
55  
56  
57  
58  
59  
60

1  
2  
3 conflict with their own assumptions. However, if QI teams interact with patients in the phases of  
4 *capturing experiences* and *taking action*, a new understanding of needs, anchored in patients'  
5 experiences rather than current healthcare practices, might be identified. This can lead to a sense  
6 of urgency and a tension for change [8]. In such QI projects, patients' views would balance the  
7 inside-out perspective of staff.  
8  
9

10  
11 However, as previously argued, patient involvement presents several challenges, such as the need  
12 for resources [12], and problems related to tokenism [13,14], validity [15], and competence [16].  
13 Firstly, dividing an improvement cycle into distinct phases and identifying the stages in which  
14 patient involvement has the greatest impact on the radicality of the improvement will enable the  
15 allocation of resources required for patient involvement to the most relevant phases. Secondly,  
16 minimising the risk of tokenism requires conditions for authentic patient involvement that can lead  
17 to a sense of urgency and a tension for change. This can best be provided in the *capturing*  
18 *experiences* and *taking action* phases, where this study shows that patient involvement has most  
19 impact on radicality. Thus, patient involvement in these phases can help to reduce the risk of  
20 tokenism, i.e. ensuring that the patients voice is listened to and acted upon. Our study, therefore,  
21 supports the notion that patients' active participation in practical QI projects lays a foundation for  
22 real impact. Thirdly, in contrast with previous studies suggesting validity problems when involving  
23 patients [15], this study measured healthcare professionals' perception of patients' influence and  
24 experience, and showed that patient involvement increase the likelihood of finding a radical  
25 solution particularly in certain phases of a QI project. Fourthly, concerns have been raised as to the  
26 competence of patients to contribute to QI. This can be due both to a lack of professional knowledge  
27 [12] and to the sharing of power, which challenges current power relations [13,17]. According to  
28 Gaventa and Cornwall [38] the relationship between power and knowledge can be regarded from  
29 at least three perspectives: (1) knowledge owned by powerful experts and transferred to the  
30 powerless as truth yielded by objective research; (2) knowledge as controlled by the powerful,  
31 where the powerless may be occasionally invited to produce and act upon a set agenda of  
32 knowledge creation; and (3) an emphasis on participation in the knowledge production, where co-  
33 production builds greater awareness and self-consciousness of capacities for action [38]. According  
34 to this, only in the third perspective can healthcare staff perceive patient's perspectives as equally  
35 important, and knowledge about what needs to be improved as co-created without a set agenda.  
36 Having such an approach means that the patient is regarded as a capable person with unique  
37  
38  
39  
40  
41  
42  
43  
44  
45  
46  
47  
48  
49  
50  
51  
52  
53  
54  
55  
56  
57  
58  
59  
60



1  
2  
3 knowledge [39] and a partner in developing care through participation in QI. The findings in our  
4 study support this view while still respecting the professional knowledge held by healthcare staff  
5 (i.e. given that the *identify and prioritise* phase had the lowest impact on radicality, it should be  
6 developed by professionals based on their broader healthcare experience).  
7  
8

9  
10 As it is based on data from a variety of QI projects cross different specialities of care, the findings  
11 from this study have practical implications for improvement projects that involve patients.  
12 Generally, as healthcare is co-created and produced within the interactions between patients and  
13 health professionals [12], the staff's perspective should be balanced with that of patients. Power  
14 and ethics could be a barrier to forging a true partnership between patients and staff, but our results  
15 can nevertheless help by defining when patient involvement is most beneficial for radicality.  
16 Besides proving the criticality and usefulness of patient involvement, this knowledge can help  
17 prioritise resources spent on patient involvement. Hence, current change models (e.g. Nolan's  
18 model for quality improvement, PDSA) and more specific patient involvement frameworks (e.g.  
19 Experienced Based Co-Design, tracer methodology) may benefit from infusing the findings from  
20 the present study in their work. Further, the findings can be used in order to identify specific  
21 methods, e.g. process mapping and fishbone analyses, where incorporation of the patient might be  
22 efficient.  
23  
24

25  
26 In further research, a general question to be asked in relation to these frameworks and methods is  
27 if patients are invited to participate in various phases and activities and if they are effectively  
28 engaged. The findings can also be used as basis for understanding the relative importance of various  
29 patient activities in co-creation models where patients are involved as representatives in trial  
30 management groups, steering committees, and data monitoring teams [40]. Furthermore, it would  
31 be of interest for future research to study how the impact of patient involvement on radicality is  
32 affected by the type of healthcare setting, such as acute vs. chronic care, standardised simple  
33 procedures vs. complex care, as well as type of speciality. Another potential area for future research  
34 would be to identify what methods could be used to support patient involvement in the different  
35 phases of QI. For instance, well established methods such as concept mapping [41], where there is  
36 a clear distinction between stakeholders' and researchers' responsibilities within the cycle, could  
37 be tested in patient involvement in healthcare.  
38  
39

40  
41 This study has several limitations. Firstly, it clarifies the effects of patient involvement in QI  
42 initiatives in the specific context of Swedish healthcare. Secondly, as patient involvement in QI is  
43  
44  
45  
46  
47  
48  
49  
50  
51  
52

1  
2  
3 a relatively new practice, the sampling strategy involved choosing participants who were trained  
4 and had experience in QI [25,26]. When these practices have been in use for a longer time and by  
5 more healthcare professionals, a different sampling strategy might be used and also include patients  
6 with experience from QI work.  
7  
8  
9

## 10 11 12 **Conclusion**

13  
14 In conclusion, before considering involving patients in improvement initiatives, it is essential to  
15 decide how and when to involve them. Consideration should be given to the phase in which patients  
16 have the potential to co-create radical and valuable insights for improvement initiatives. This study  
17 showed that patient involvement has the greatest impact on radicality in the phases *capture*  
18 *experiences* and *taking action*, a moderate impact in the *evaluate* phase, and the lowest impact on  
19 the *identify and prioritise* phase.  
20  
21  
22  
23  
24  
25

## 26 27 **Contributors**

28  
29 IG, ME and SG developed and directed the survey. IG and ME performed the statistical analysis.  
30 IG, ME and FS designed this specific study and did the draft and editing of the manuscript. All  
31 authors approved the manuscript.  
32  
33  
34  
35

## 36 37 **Competing interests**

38  
39 None declared.  
40  
41  
42  
43

## 44 45 **Funding**

46  
47 This research received no specific grant from any funding agency in the public,  
48 commercial or not-for-profit sectors.  
49  
50  
51  
52  
53

## 54 55 **Data sharing statement**

1  
2  
3  
4  
5  
6  
7  
8  
9  
10  
11  
12  
13  
14  
15  
16  
17  
18  
19  
20  
21  
22  
23  
24  
25  
26  
27  
28  
29  
30  
31  
32  
33  
34  
35  
36  
37  
38  
39  
40  
41  
42  
43  
44  
45  
46  
47  
48  
49  
50  
51  
52  
53  
54  
55  
56  
57  
58  
59  
60

The database is held at the host institution and analysis and access to the data are limited to on-site access. More detailed analysis results are available on request to the corresponding author.

For peer review only

## REFERENCES

- 1 Mohrman S, Shani AB, McCracken A. Organizing for sustainable healthcare. The emerging global challenge. In: Mohrman S, Shani AB, eds. *Organizing for sustainability* (Vol. 2). Bingley, UK: Emerald 2012:1–39.
- 2 Ocloo J, Matthews R. From tokenism to empowerment: progressing patient and public involvement in healthcare improvement. *BMJ Qual Safety* 2016;25(8):626–32.  
doi: 10.1136/bmjqs-2015-004839
- 3 Brett J, Staniszewska S, Mockford C, et al. Mapping the impact of patient and public involvement on health and social care research: a systematic review. *Health Expect* 2014;17(5):637–650. doi: [10.1111/j.1369-7625.2012.00795.x](https://doi.org/10.1111/j.1369-7625.2012.00795.x)
- 4 Berwick DM. The science of improvement. *JAMA* 2008;299(10):1182–1184.  
doi: 10.1001/jama.299.10.1182.
- 5 Charmel P, Frampton S. Building the business case for patient-centered care. *Health Finan Manag* 2008;62(80):1–5.
- 6 Bessant, J., & Maher, L. (2009). Developing radical service innovations in healthcare—the role of design methods. *International Journal of Innovation Management*, 13(04), 555-568.  
<https://www.worldscientific.com/doi/abs/10.1142/S1363919609002418>
- 7 Taran Y, Boer H, Lindgren P. Theory building—towards an understanding of business model innovation processes. In: *Proceedings of the international DRUID-DIME academy winter conference, economics and management of innovation, technology and organizational change 2009*.
- 8 Elg M, Engström J, Witell L, et al. Co-creation and learning in health-care service development. *J Serv Manag* 2012;23(3):328–43.  
<https://doi.org/10.1108/09564231211248435>
- 9 Spinuzzi C. The methodology of participatory design. *Technol Commun* 2005;52(2):163–74.
- 10 Armstrong N, Herbert G, Aveling E-L, et al. Optimizing patient involvement in quality improvement. *Health Expect* 2013;16(3):e36–47. doi: 10.1111/hex.12039.

- 1  
2  
3  
4  
5  
6 11 Osborne SP, Strokosch K. It takes two to tango? Understanding the Co-production of public  
7 services by integrating the services management and public administration perspectives. *British*  
8 *Journal of Management* 2013;24(S1). doi: 10.1111/1467-8551.12010  
9  
10  
11 12 Batalden M, Batalden P, Margolis P, et al. Coproduction of healthcare service. *BMJ Qual Saf*  
12 2016;25(7):509–17. doi: 10.1136/bmjqs-2015-004315.  
13  
14  
15 13 Eikeland, O. (2006). Condensing ethics and action research: Extended review  
16 article. *Action Research*, 2006;4(1):37–47.  
17  
18  
19 14 Snape D, Kirkham J, Preston J, et al. Exploring areas of consensus and conflict around values  
20 underpinning public involvement in health and social care research: a modified Delphi  
21 study. *BMJ open*, 2014;4(1):e004217. doi: 10.1136/bmjopen-2013-004217.  
22  
23  
24 15 Hubbard G, Kidd L, Donaghy E, et al. A review of literature about involving people affected  
25 by cancer in research, policy and planning and practice. *Patient Educ Couns* 2007;65(1):21–33.  
26 doi: [10.1016/j.pec.2006.02.009](https://doi.org/10.1016/j.pec.2006.02.009)  
27  
28  
29  
30 16 Batalden PB, Stoltz P. A framework for the continual improvement of health care; building and  
31 applying professional and improvement knowledge to test changes in daily work. *Joint Comm J*  
32 *Qual Improv* 1993;19(10):432–52.  
33  
34  
35  
36 17 Smith F, Wallengren C, Öhlén J. Participatory design in education materials in a health care  
37 context. *Action Research* 2016;15(3):310–36. <https://doi.org/10.1177/1476750316646832>  
38  
39  
40 18 Iedema R, Merrick E, Piper D, et al. Codesigning as a discursive practice in emergency health  
41 services: the architecture of deliberation. *J Appl Behav Sci* 2010;46(1):73–91.  
42 <https://doi.org/10.1177/0021886309357544>  
43  
44  
45 19 Gustavsson S. Improvements in neonatal care; using experience-based co-design. *Int J Health*  
46 *Care Qual Assur* 2014;27(5):427–438. doi: 10.1108/IJHCQA-02-2013-0016  
47  
48  
49 20 Mockford C, Staniszewska S, Griffiths F, et al. The impact of patient and public involvement  
50 on UK NHS health care: a systematic review. *Int J Qual Health Care* 2011;24(1):28–38. doi:  
51 10.1093/intqhc/mzr066.  
52  
53  
54  
55  
56  
57  
58  
59  
60

1  
2  
3 21 Wiig S, Storm M, Aase K, et al. Investigating the use of patient involvement and patient  
4 experience in quality improvement in Norway: rhetoric or reality? *BMC Health Serv Res*  
5 2013;13:206. doi: 10.1186/1472-6963-13-206.  
6  
7

8  
9 22 Bate P, Robert G. Toward more user-centric OD: Lessons from the field of experience-based  
10 design and a case study. *J Appl Behav Sci* 2007;43(41):41–66.  
11 <https://doi.org/10.1177/0021886306297014>  
12  
13

14 23 Elg M, Witell L, Poksinska B, et al. Solicited diaries as a means for involving patients in  
15 development of healthcare services. *Int J Qual Serv Sci* 2011;3(2):128–45.  
16 <https://doi.org/10.1108/17566691111146050>  
17  
18

19  
20 24 Codex. Regler och riktlinjer för forskning. <http://www.codex.uu.se/> (accessed 1 March 2015).  
21  
22

23 25 Pettigrew, A. M. Longitudinal field research on change: Theory and  
24 practice. *Organization science*, 1990;1(3):267-292.  
25  
26  
27

28  
29  
30 26 Van de Ven, A. Engaged scholarship: A guide for organizational and social research.  
31 Oxford, UK: Oxford University Press on Demand 2007.  
32  
33

34  
35  
36  
37 27 Andersson A-C, Elg M, Perseus K-I, et al. Evaluating a questionnaire to measure  
38 improvement initiatives in Swedish healthcare. *BMC Health Serv Res* 2013;13:48  
39 doi:10.1186/1472-6963-13-48  
40  
41

42 28 Donetto S, Tsianakas V, Robert G. Using experience-based Co-design (EBCD) to improve the  
43 quality of healthcare: mapping where we are now and establishing future directions. London:  
44 King's College London 2014.  
45  
46  
47

48 29 Gustafsson A, Kristensson P, Witell L. Customer co-creation in service innovation: a matter of  
49 communication? *J Serv Manag* 2012;23(3):311–27. <https://doi.org/10.1108/09564231211248426>  
50  
51

52 30 Cooper, R.G. (1979) “The dimensions of industrial new product success and failure”, *Journal*  
53 *of Marketing*, 1979;43(3):93-103.  
54  
55

1  
2  
3 31 Tidd J, Bessant J. Managing Innovation. Integrating Technological, Market and  
4  
5 Organisational Change. Chichester, UK: John Wiley and Sons 2009.  
6  
7

8  
9 32 Hertog, P, Gallouj, F, Segers, J. Measuring innovation in a 'low-tech' service industry:  
10  
11 the case of the Dutch hospitality industry. *The Service Industries Journal*  
12  
13 2011;31(9):1429–1449. doi: 10.1080/02642060903576084  
14  
15

16  
17 33 Cocosila M, Archer N. Perceptions of chronically ill and healthy consumers about  
18  
19 electronic personal health records: a comparative empirical investigation. *BMJ Open*  
20  
21 2014;4(7):e005304–e005304. doi: 10.1136/bmjopen-2014-005304  
22  
23

24  
25 34 Fornell C, Larcker D. Evaluating structural equation models with unobservable  
26  
27 variables and measurement errors. *J Marketing Res* 1981;18(1):39–50. doi:  
28  
29 10.2307/3151312  
30  
31

32  
33 35 Fornell C, Cha J. Partial Least Squares. In: Bagozzi RP, ed. Advanced methods of  
34  
35 marketing research. Cambridge, MA: Blackwell 1994:52–78  
36  
37

38  
39 36 Chang W, Taylor SA. The effectiveness of customer participation in new product  
40  
41 development: a meta-analysis. *J Market* 2016;80(1):47–64.  
42  
43

44  
45 doi: <http://dx.doi.org/10.1509/jm.14.0057>  
46  
47

48  
49 37 Von Hippel, E. Lead users: a source of novel product concepts. *Management Science*  
50  
51 1986;32(7):791–805. <https://doi.org/10.1287/mnsc.32.7.791>  
52  
53

1  
2  
3 38 Gaventa J, Cornwall A. Power and Knowledge. In: Reason P, Bradbury H, eds. The  
4 Sage handbook of action research: Participative inquiry and practice. Cornwall, UK: Sage  
5  
6 Publications 2008:172–89.  
7  
8

9  
10  
11 39 Ekman I, Swedberg K, Taft C, et al. Person-centered care—Ready for prime time.  
12  
13  
14 *Eur J Cardiovasc Nurs* 2011;10(4), 248–251. doi: 10.1016/j.ejcnurse.2011.06.008  
15

16  
17 40 South, A., Hanley, B., Gafos, M., Cromarty, B., Stephens, R., Sturgeon, K., ... & Vale,  
18  
19 C. L. (2016). Models and impact of patient and public involvement in studies carried out  
20  
21 by the Medical Research Council Clinical Trials Unit at University College London: findings  
22  
23 from ten case studies. *Trials* 2016; 17(1):376.  
24  
25

26  
27  
28  
29 41 Burke JG, O'Campo P, Peak GL, et al. An introduction to concept mapping as a  
30  
31 participatory public health research method. *Qual Health Res* 2005; 15(10):1392–1410.  
32  
33  
34  
35 doi: [10.1177/1049732305278876](https://doi.org/10.1177/1049732305278876)  
36  
37

38  
39  
40  
41  
42 Figure 1. Model of radicality of improvement. Latent variables are the phases of an improvement project: *capture*  
43  
44 *experiences, identify and prioritise, taking action, and evaluate.*  
45  
46  
47  
48  
49  
50  
51  
52  
53  
54  
55  
56  
57  
58  
59  
60



1  
2  
3  
4  
5  
6  
7  
8  
9  
10  
11  
12  
13  
14  
15  
16  
17  
18  
19  
20  
21  
22  
23  
24  
25  
26  
27  
28  
29  
30  
31  
32  
33  
34  
35  
36  
37  
38  
39  
40  
41  
42  
43  
44  
45  
46  
47  
48  
49  
50  
51  
52  
53  
54  
55  
56  
57  
58  
59  
60

For peer review only

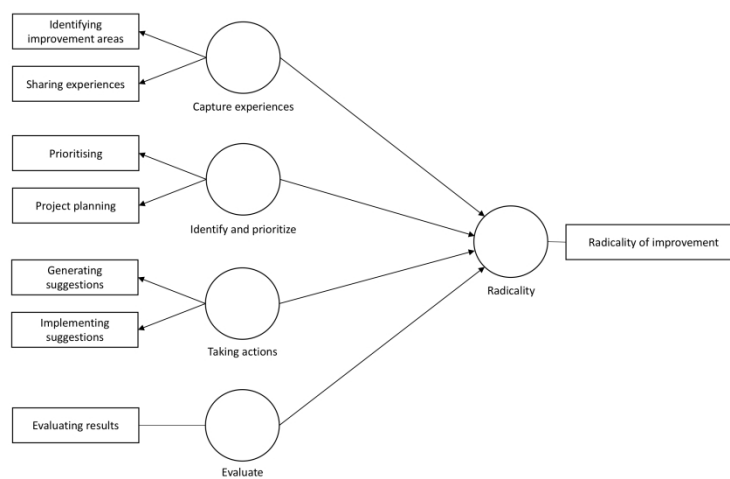

Figure 1. Model of radicality of improvement. Latent variables are the phases of an improvement project: capture experiences, identify and prioritise, taking action, and evaluate.

297x209mm (300 x 300 DPI)

STROBE Statement—Checklist of items that should be included in reports of *cross-sectional studies*

|                           | Item No | Recommendation                                                                                                                                                                                    | Page no                                           |
|---------------------------|---------|---------------------------------------------------------------------------------------------------------------------------------------------------------------------------------------------------|---------------------------------------------------|
| <b>Title and abstract</b> | 1       | (a) Indicate the study's design with a commonly used term in the title or the abstract                                                                                                            | 1, 2                                              |
|                           |         | (b) Provide in the abstract an informative and balanced summary of what was done and what was found                                                                                               | 2                                                 |
| <b>Introduction</b>       |         |                                                                                                                                                                                                   |                                                   |
| Background/rationale      | 2       | Explain the scientific background and rationale for the investigation being reported                                                                                                              | 3, 4                                              |
| Objectives                | 3       | State specific objectives, including any prespecified hypotheses                                                                                                                                  | 4                                                 |
| <b>Methods</b>            |         |                                                                                                                                                                                                   |                                                   |
| Study design              | 4       | Present key elements of study design early in the paper                                                                                                                                           | 5                                                 |
| Setting                   | 5       | Describe the setting, locations, and relevant dates, including periods of recruitment, exposure, follow-up, and data collection                                                                   | 5                                                 |
| Participants              | 6       | (a) Give the eligibility criteria, and the sources and methods of selection of participants                                                                                                       | 5                                                 |
| Variables                 | 7       | Clearly define all outcomes, exposures, predictors, potential confounders, and effect modifiers. Give diagnostic criteria, if applicable                                                          | 6, 7 (Table 1 plus the paragraph after the table) |
| Data sources/measurement  | 8*      | For each variable of interest, give sources of data and details of methods of assessment (measurement). Describe comparability of assessment methods if there is more than one group              | 5                                                 |
| Bias                      | 9       | Describe any efforts to address potential sources of bias                                                                                                                                         | 5                                                 |
| Study size                | 10      | Explain how the study size was arrived at                                                                                                                                                         | N/A                                               |
| Quantitative variables    | 11      | Explain how quantitative variables were handled in the analyses. If applicable, describe which groupings were chosen and why                                                                      | 7                                                 |
| Statistical methods       | 12      | (a) Describe all statistical methods, including those used to control for confounding                                                                                                             | 7                                                 |
|                           |         | (b) Describe any methods used to examine subgroups and interactions                                                                                                                               | N/A                                               |
|                           |         | (c) Explain how missing data were addressed                                                                                                                                                       | N/A                                               |
|                           |         | (d) If applicable, describe analytical methods taking account of sampling strategy                                                                                                                | N/A                                               |
|                           |         | (e) Describe any sensitivity analyses                                                                                                                                                             | 9                                                 |
| <b>Results</b>            |         |                                                                                                                                                                                                   |                                                   |
| Participants              | 13*     | (a) Report numbers of individuals at each stage of study—eg numbers potentially eligible, examined for eligibility, confirmed eligible, included in the study, completing follow-up, and analysed | N/A                                               |
|                           |         | (b) Give reasons for non-participation at each stage                                                                                                                                              | 5                                                 |
|                           |         | (c) Consider use of a flow diagram                                                                                                                                                                | N/A                                               |
| Descriptive data          | 14*     | (a) Give characteristics of study participants (eg demographic, clinical, social) and information on exposures and potential confounders                                                          | 8                                                 |
|                           |         | (b) Indicate number of participants with missing data for each variable of interest                                                                                                               | N/A                                               |

|                          |     |                                                                                                                                                                                                              |                      |
|--------------------------|-----|--------------------------------------------------------------------------------------------------------------------------------------------------------------------------------------------------------------|----------------------|
| Outcome data             | 15* | Report numbers of outcome events or summary measures                                                                                                                                                         | 9 (Figure 1)         |
| Main results             | 16  | (a) Give unadjusted estimates and, if applicable, confounder-adjusted estimates and their precision (eg, 95% confidence interval). Make clear which confounders were adjusted for and why they were included | 9 (Figure 1)         |
|                          |     | (b) Report category boundaries when continuous variables were categorized                                                                                                                                    | N/A                  |
|                          |     | (c) If relevant, consider translating estimates of relative risk into absolute risk for a meaningful time period                                                                                             | N/A                  |
| Other analyses           | 17  | Report other analyses done—eg analyses of subgroups and interactions, and sensitivity analyses                                                                                                               | 9 (Table 3)          |
| <b>Discussion</b>        |     |                                                                                                                                                                                                              |                      |
| Key results              | 18  | Summarise key results with reference to study objectives                                                                                                                                                     | 10                   |
| Limitations              | 19  | Discuss limitations of the study, taking into account sources of potential bias or imprecision. Discuss both direction and magnitude of any potential bias                                                   | 11, 12               |
| Interpretation           | 20  | Give a cautious overall interpretation of results considering objectives, limitations, multiplicity of analyses, results from similar studies, and other relevant evidence                                   | 10, 11               |
| Generalisability         | 21  | Discuss the generalisability (external validity) of the study results                                                                                                                                        | 11                   |
| <b>Other information</b> |     |                                                                                                                                                                                                              |                      |
| Funding                  | 22  | Give the source of funding and the role of the funders for the present study and, if applicable, for the original study on which the present article is based                                                | No funding to report |

\*Give information separately for exposed and unexposed groups.

**Note:** An Explanation and Elaboration article discusses each checklist item and gives methodological background and published examples of transparent reporting. The STROBE checklist is best used in conjunction with this article (freely available on the Web sites of PLoS Medicine at <http://www.plosmedicine.org/>, Annals of Internal Medicine at <http://www.annals.org/>, and Epidemiology at <http://www.epidem.com/>). Information on the STROBE Initiative is available at [www.strobe-statement.org](http://www.strobe-statement.org).
